# Supplementary material for: Comparative Reverse Vaccinology of Piscirickettsia salmonis, Aeromonas salmonicida, Yersinia ruckeri, Vibrio anguillarum and Moritella viscosa, Frequent Pathogens of Atlantic Salmon and Lumpfish Aquaculture
Source: MDPI journal article supplement (doi:10.3390/vaccines10030473), 2022-03-18

# Structure Assessment

[Help](#)[Examples ▾](#)

## MHC II Alpha Chain; Model 01;

[Project Data ▾](#)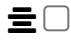

Created: Fri 4th Feb, 02:53;

### Ramachandran Plots

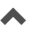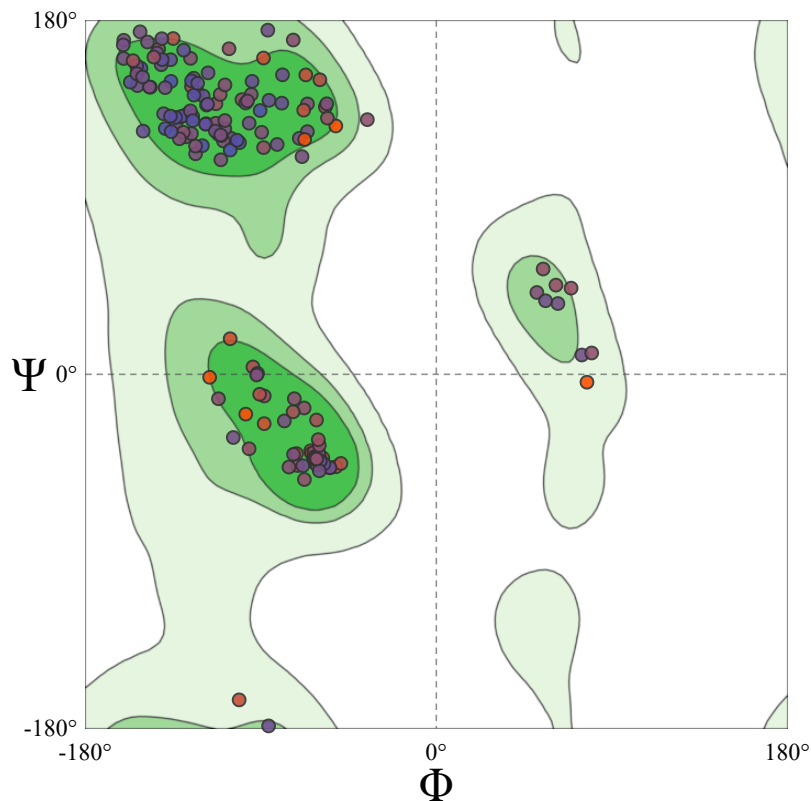[General](#)[Glycine](#)[Proline](#)[Pre-Proline](#)[Chain A ▾](#)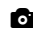

### MolProbity Results

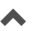

MolProbity  
Score 1.42

☐ Clash Score 3.71 (A66 TYR-A75 ASP)

Ramachandran 96.17%  
Favoured

Ramachandran 0.00%  
Outliers

|                                            |           |                                                                                                                                                                                                             |
|--------------------------------------------|-----------|-------------------------------------------------------------------------------------------------------------------------------------------------------------------------------------------------------------|
| Rotamer Outliers                           | 0.00%     |                                                                                                                                                                                                             |
| <input type="checkbox"/> C-Beta Deviations | 3         | A199 ALA, A173 GLN, A108 ASN                                                                                                                                                                                |
| Bad Bonds                                  | 0 / 1565  |                                                                                                                                                                                                             |
| <input type="checkbox"/> Bad Angles        | 16 / 2136 | A80 PHE, (A41 GLY-A42 THR), A110 PRO, A84 ASN, (A109 ASN-A110 PRO), A175 PHE, A29 HIS, A57 VAL, A197 HIS, (A37 CYS-A96 CYS), A94 ASN, A174 THR, (A184 THR-A185 PRO), (A143 TYR-A144 PRO), A75 ASP, A107 GLU |
| <input type="checkbox"/> Cis Non-Proline   | 1 / 170   | (A41 GLY-A42 THR)                                                                                                                                                                                           |
| <input type="checkbox"/> Cis Prolines      | 1 / 14    | (A143 TYR-A144 PRO)                                                                                                                                                                                         |

Results obtained using MolProbity version 4.4

Quality Estimate

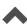

QMEANDisCo Global: 0.68 ± 0.06 ⓘ

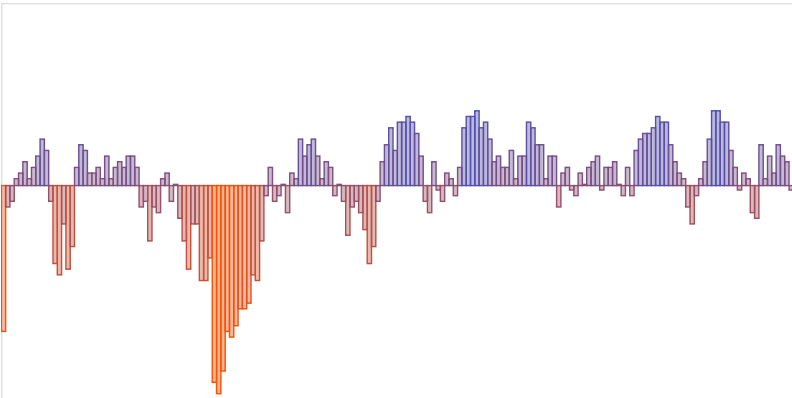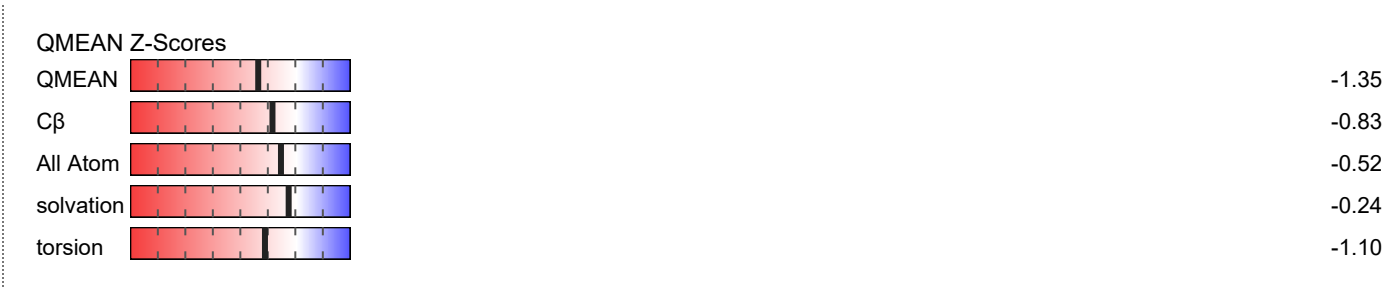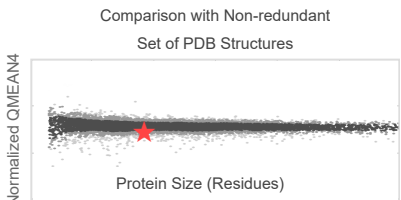

Residue Quality

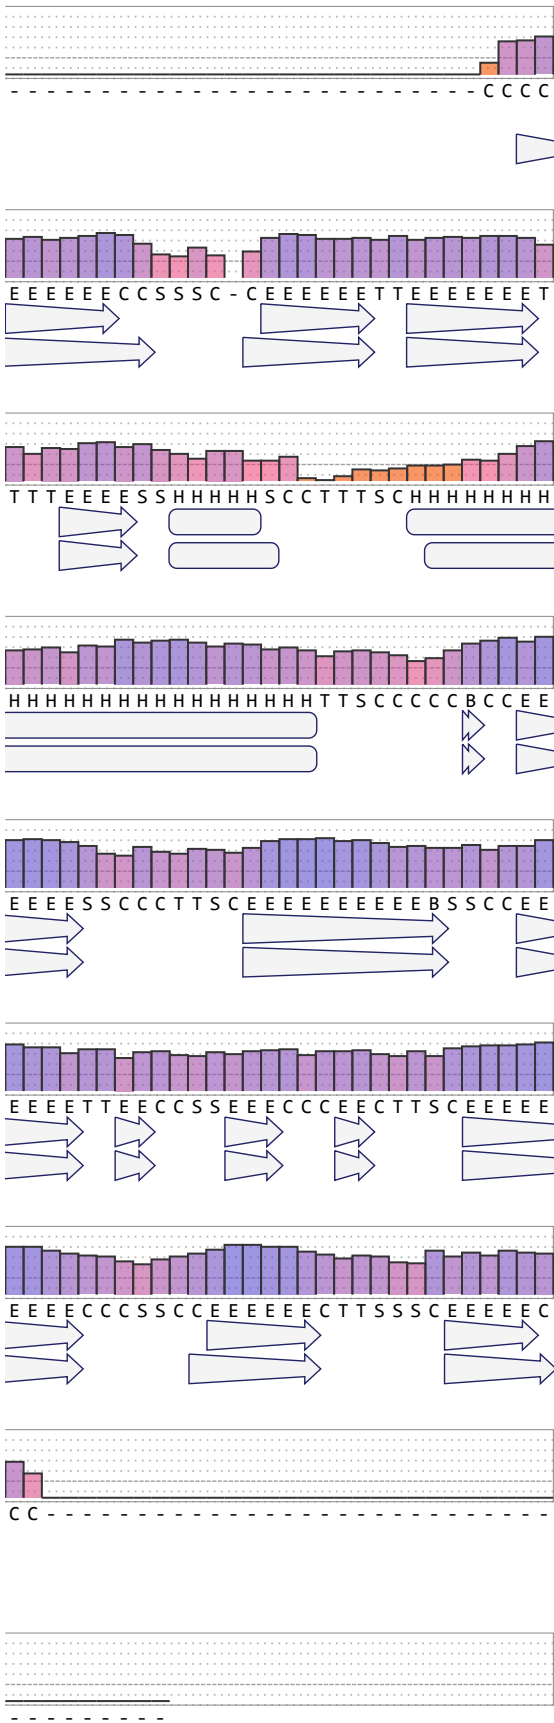

|          |                                 |     |
|----------|---------------------------------|-----|
| QMEAN    |                                 | 30  |
| Chain:A  | MKTCSSDMRRSALIIILMINSFCAFSQIPHE |     |
| 3wex.1.A | -----ADHV                       | 6   |
| QMEAN    |                                 |     |
| Chain:A  | VVYVVGCFENGTEAVFEFDAEELLYVDF    | 59  |
| 3wex.1.A | STYAMFVQTHRPTGEFMFEFDEDEQFYVDL  | 36  |
| QMEAN    |                                 |     |
| Chain:A  | DRDEVVYTMPRFLTDDPSKLFENLNVFNNA  | 89  |
| 3wex.1.A | DKKETVWHLEEFGRAF---SFEAQ---GG   | 59  |
| QMEAN    |                                 |     |
| Chain:A  | KKNRNICLSIIKIYKLEENNPPEEMDPPES  | 119 |
| 3wex.1.A | LANIAILNNNLNTLIQRSNHTQAANDPPEV  | 89  |
| QMEAN    |                                 |     |
| Chain:A  | IILYPSEEVQLGVENSLICFVNHFYPPPIKV | 149 |
| 3wex.1.A | TVFPKEPVVELGQPNTLICHIDRFFPPVLNV | 119 |
| QMEAN    |                                 |     |
| Chain:A  | SWTRNGRLVSEGQSLSRYYPNNDQTFHQFT  | 179 |
| 3wex.1.A | TWLCNGEPVTEGVAESLFLPRTDYSFHKFH  | 149 |
| QMEAN    |                                 |     |
| Chain:A  | TLTFTPKEGDIYSCTVEHLALDRPKTRSWV  | 209 |
| 3wex.1.A | YLTfVPSAEDVYDCRVEHWGLDQPLLKHWE  | 179 |
| QMEAN    |                                 |     |
| Chain:A  | PDFSHPSLPGPGVYCGVGLTVGLLGVAVGTF | 239 |
| 3wex.1.A | AQ-----                         | 181 |
| QMEAN    |                                 |     |
| Chain:A  | LMVKGCRGQ                       | 248 |
| 3wex.1.A | -----                           |     |

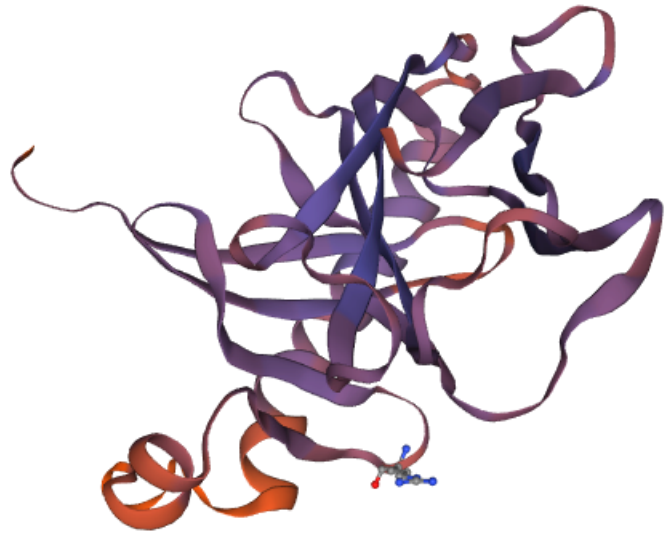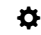

Cartoon ▲

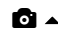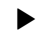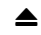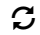

Supplement: s1 [file s1]
