# Supplementary material for: Comparative Reverse Vaccinology of Piscirickettsia salmonis, Aeromonas salmonicida, Yersinia ruckeri, Vibrio anguillarum and Moritella viscosa, Frequent Pathogens of Atlantic Salmon and Lumpfish Aquaculture
Source: MDPI journal article supplement (doi:10.3390/vaccines10030473), 2022-03-18

# Structure Assessment

Help

Examples ▾

salmon\_MHCII\_refined.pdb;

Project Data ▾

 ☐

Created: Fri 14th Jan, 23:57;

We do not predict the uploaded structure to have a transmembrane segment.

## Ramachandran Plots

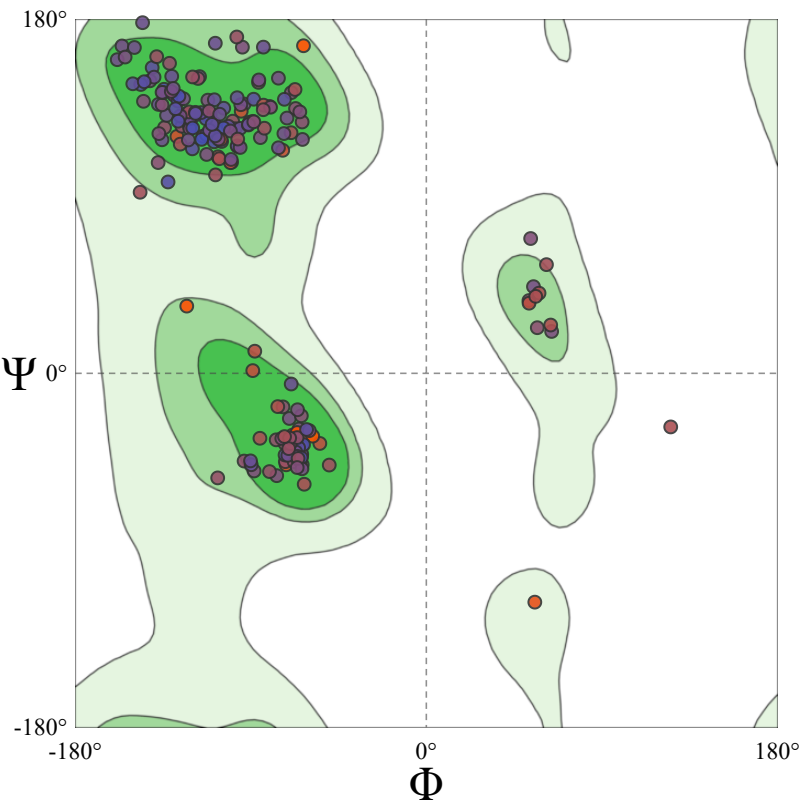

General

Glycine

Proline

Pre-Proline

All selected (2) ▾



## MolProbity Results

|                                      |        |                   |
|--------------------------------------|--------|-------------------|
| MolProbity Score                     | 1.50   |                   |
| <input type="checkbox"/> Clash Score | 9.35   | (B23 PHE-B75 CYS) |
| Ramachandran Favoured                | 98.43% |                   |

|                          |                       |           |                                                                                                                                                                                                                                                                                                                                                                                                                 |
|--------------------------|-----------------------|-----------|-----------------------------------------------------------------------------------------------------------------------------------------------------------------------------------------------------------------------------------------------------------------------------------------------------------------------------------------------------------------------------------------------------------------|
| <input type="checkbox"/> | Ramachandran Outliers | 1.18%     | A160 VAL, A73 TYR, A131 PRO                                                                                                                                                                                                                                                                                                                                                                                     |
| <input type="checkbox"/> | Rotamer Outliers      | 0.92%     | A131 PRO, B81 ILE                                                                                                                                                                                                                                                                                                                                                                                               |
| <input type="checkbox"/> | C-Beta Deviations     | 9         | A131 PRO, A160 VAL, A163 ASN, A122 LEU, A187 LEU, B44 TYR, A120 ASN, A155 TYR, A73 TYR                                                                                                                                                                                                                                                                                                                          |
|                          | Bad Bonds             | 0 / 2097  |                                                                                                                                                                                                                                                                                                                                                                                                                 |
| <input type="checkbox"/> | Bad Angles            | 41 / 2857 | B4 PHE, (A132 ALA-A133 PRO), B25 HIS, A131 PRO, A120 ASN, A122 LEU, (A159 ASP-A160 VAL), (A65 ASP-A66 PRO), (B79 ALA-B80 PRO), B5 TYR, A163 ASN, (A61 PRO-A62 PRO), B44 TYR, A77 VAL, B77 HIS, A47 TRP, A126 VAL, A187 LEU, A72 HIS, (A72 HIS-A73 TYR), A132 ALA, A155 TYR, A105 HIS, A22 HIS, A73 TYR, A125 HIS, B23 PHE, A63 PHE, (B2 GLY-B3 TYR), (A168 LEU-A169 PRO), A184 HIS, A164 GLN, A79 ASN, A156 PRO |
| <input type="checkbox"/> | Twisted Non-Proline   | 1 / 239   | (A97 PRO-A98 GLU)                                                                                                                                                                                                                                                                                                                                                                                               |

Results obtained using MolProbity version 4.4

Quality Estimate

QMEANDisCo Global: 0.68 ± 0.05 ⓘ

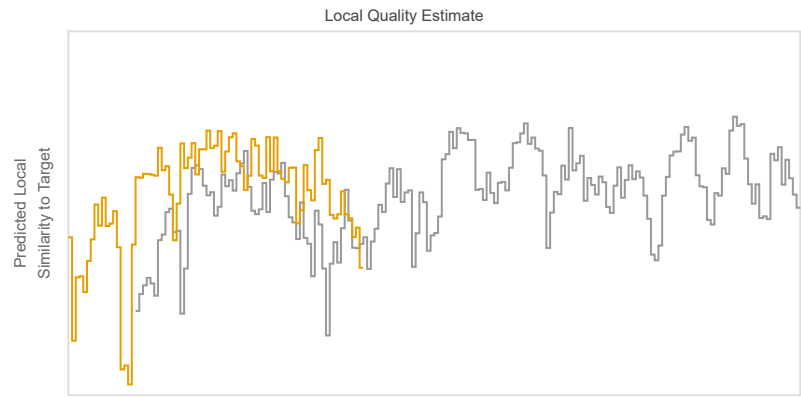

|                |  |       |
|----------------|--|-------|
| QMEAN Z-Scores |  |       |
| QMEAN          |  | -1.47 |
| Cβ             |  | -0.61 |
| All Atom       |  | -0.55 |
| solvation      |  | -0.48 |
| torsion        |  | -1.27 |

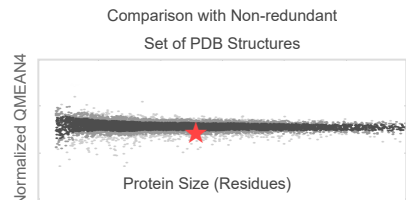

Residue Quality

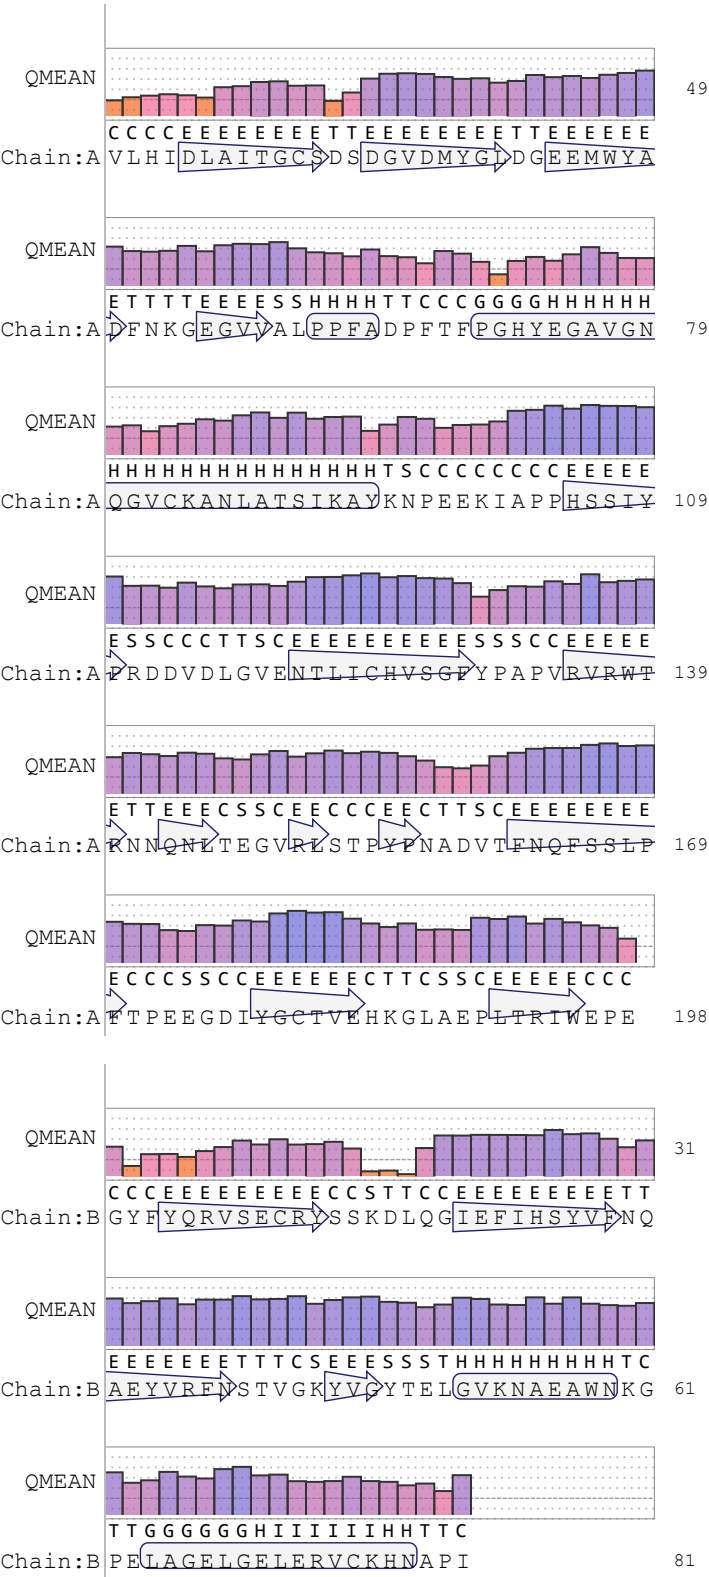

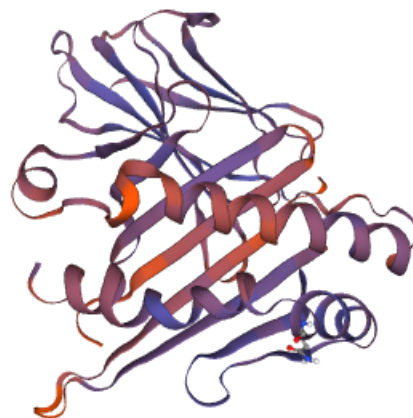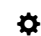

Cartoon ▲

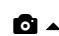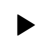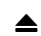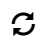

Supplement: s1 [file s1]
