# Supplementary material for: Comparative Reverse Vaccinology of Piscirickettsia salmonis, Aeromonas salmonicida, Yersinia ruckeri, Vibrio anguillarum and Moritella viscosa, Frequent Pathogens of Atlantic Salmon and Lumpfish Aquaculture
Source: MDPI journal article supplement (doi:10.3390/vaccines10030473), 2022-03-18

# Structure Assessment

[Help](#)[Examples ▾](#)

## MHC II Beta Chain; Model 01;

[Project Data ▾](#)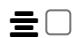

Created: Fri 4th Feb, 02:57;

### Ramachandran Plots

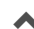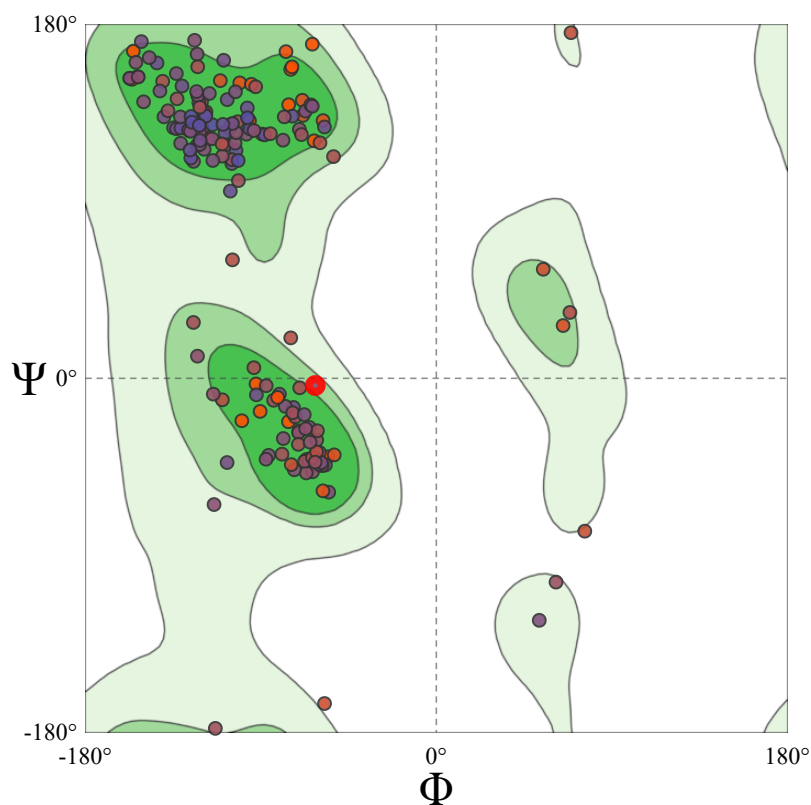

General

Glycine

Proline

Pre-Proline

Chain B ▾

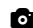

### MolProbity Results

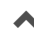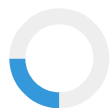

MolProbity is QUEUEING

### Quality Estimate

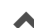

QMEANDisCo Global: 0.64 ± 0.06 ⓘ

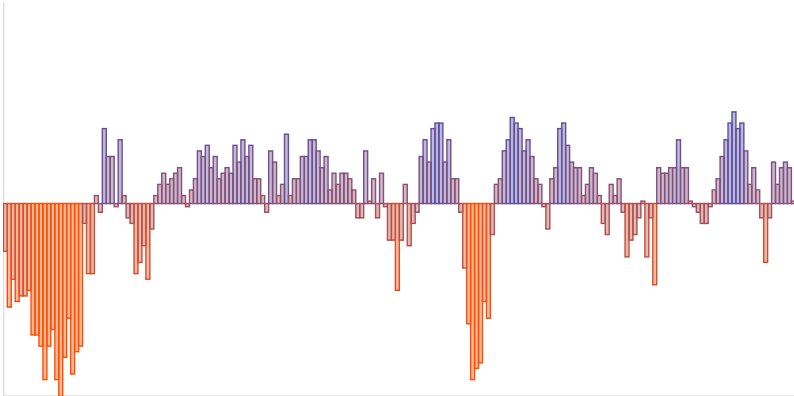

| QMEAN Z-Scores |                                                                                   |       |
|----------------|-----------------------------------------------------------------------------------|-------|
| QMEAN          |  | -3.30 |
| C $\beta$      |  | -1.10 |
| All Atom       |  | -0.56 |
| solvation      |  | -1.72 |
| torsion        |  | -2.44 |

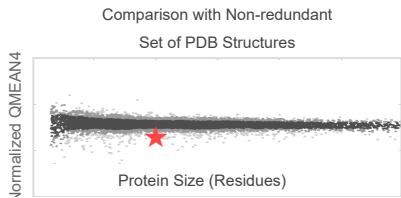

Residue Quality

|          |                                |    |
|----------|--------------------------------|----|
| QMEAN    |                                | 21 |
| Chain: B | MRIHSFFSLFRLLLYSRADA-----      |    |
| 4ah2.1.B | MRMATPLLMQALPMGGGSGGGGSGGGGSG  | 32 |
| QMEAN    |                                |    |
| Chain: B | -----LFGHGFIRCQFTSSNDTV-YLEQYY | 45 |
| 4ah2.1.B | DTRPRFLWQLKFECFFNGTERVRLLERCI  | 62 |
| QMEAN    |                                |    |
| Chain: B | INKMLLLQYNSTLGNVTGYTKKAIEIARDF | 75 |
| 4ah2.1.B | YNQEESVRFDSVDGEYRAVTELGRPDAEYW | 92 |

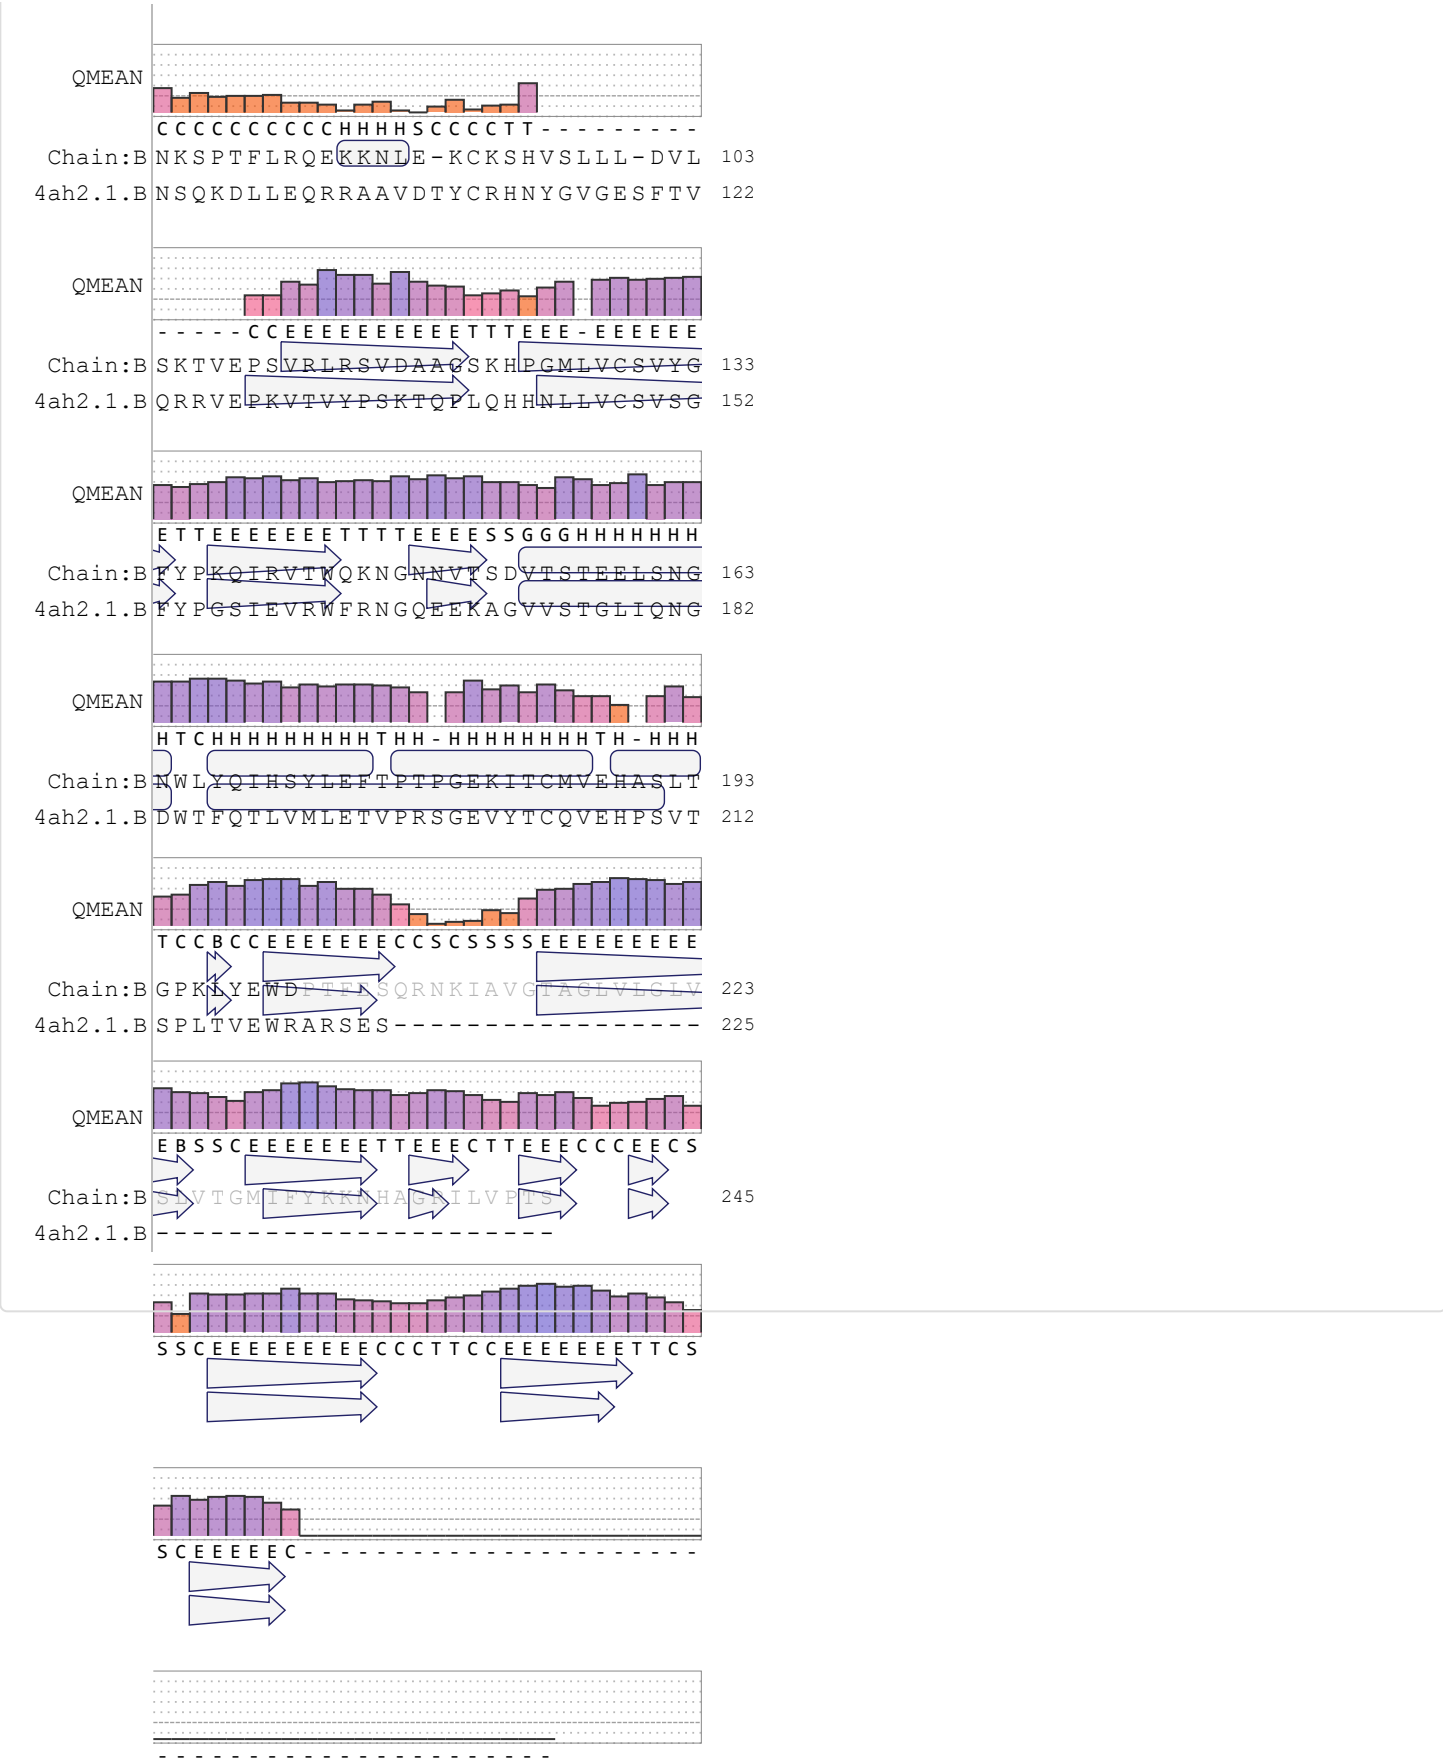

ASN 88 B

Confidence: 0.68

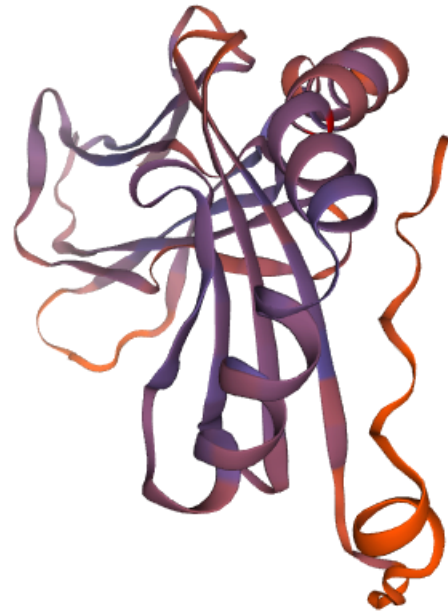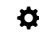

Cartoon ▲

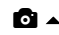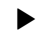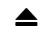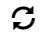

Supplement: s1 [file s1]
