# Supplementary material for: Comparative Reverse Vaccinology of Piscirickettsia salmonis, Aeromonas salmonicida, Yersinia ruckeri, Vibrio anguillarum and Moritella viscosa, Frequent Pathogens of Atlantic Salmon and Lumpfish Aquaculture
Source: MDPI journal article supplement (doi:10.3390/vaccines10030473), 2022-03-18
Supplement: s1 [file s1]

**Table S1.** Categories of MHC HLA-A (MHC class I) and HLA-DP and HLA-DQ (MHC class II) sequences present in the Vaxitop program used in this study.

| MHCs         | MHC Alleles                                                                                                                                                                                                                                                                                                                                                                                                       |
|--------------|-------------------------------------------------------------------------------------------------------------------------------------------------------------------------------------------------------------------------------------------------------------------------------------------------------------------------------------------------------------------------------------------------------------------|
| <b>MHC 1</b> | HLA-A*01:01, HLA-A*02:01, HLA-A*02:02, HLA-A*02:03, HLA-A*02:06, HLA-A*02:11, HLA-A*02:12, HLA-A*02:16, HLA-A*02:19, HLA-A*02:50, HLA-A*03:01, HLA-A*11:01, HLA-A*23:01, HLA-A*24:02, HLA-A*24:31, HLA-A*26:01, HLA-A*26:02, HLA-A*29:02, HLA-A*30:01, HLA-A*30:02, HLA-A*31:01, HLA-A*32:01, HLA-A*32:07, HLA-A*33:01, HLA-A*68:01, HLA-A*68:02, HLA-A*68:23, HLA-A*69:01, HLA-A*80:01, HLA-A11, HLA-A2, HLA-A3. |
| <b>MHC 2</b> | HLA-DPA1*01:03/DPB*02:01, HLA-DPA1*02:01/DPB*01:01, HLA-DPA1*02:01/DPB*05:01, HLA-DPA1*03:01/DPB*04:02, HLA-DPB*04:01, HLA-DPB*04:02, HLA-DQ2, HLA-DQA1*01:01/DQB1*05:01, HLA-DQA1*01:02/DQB1*06:02, HLA-DQA1*03:01/DQB1*03:02, HLA-DQA1*03:02/DQB1*04:01, HLA-DQA1*05:01/DQB1*02:01, HLA-DQA1*05:01/DQB1*03:01.                                                                                                  |

**Table S2.** Comparative reverse vaccinology outlining outer membrane antigens identified in study.

| Outer membrane antigens                  | <i>P. salmonis</i> | <i>A. salmonicida</i> | <i>V. anguillarum</i> | <i>M. viscosa</i> | <i>Y. ruckeri</i> |
|------------------------------------------|--------------------|-----------------------|-----------------------|-------------------|-------------------|
| OmpW family protein                      | +                  |                       |                       |                   |                   |
| Porin family protein                     | +                  |                       |                       |                   |                   |
| OmpA family protein                      | +                  |                       |                       | +                 |                   |
| DUF481 domain-containing protein         | +                  |                       |                       |                   |                   |
| Outer membrane protein assembly factor   | +                  | +                     |                       |                   | +                 |
| BamE                                     |                    |                       |                       |                   |                   |
| VacJ family lipoprotein                  | +                  |                       |                       |                   |                   |
| phospholipase A                          | +                  |                       |                       |                   |                   |
| LPS-assembly protein LptD                | +                  | +                     | +                     | +                 | +                 |
| Outer membrane protein assembly factor   | +                  | +                     | +                     | +                 | +                 |
| BamA                                     |                    |                       |                       |                   |                   |
| Outer membrane protein transport protein | +                  | +                     | +                     | +                 |                   |
| TolC family outer membrane protein       | +                  |                       | +                     | +                 |                   |
| LbtU family siderophore porin            | +                  |                       |                       |                   |                   |

|                                                                      |   |   |   |   |   |
|----------------------------------------------------------------------|---|---|---|---|---|
| TonB-dependent siderophore receptor                                  | + | + | + | + | + |
| Autotransporter outer membrane beta-barrel domain-containing protein | + |   |   |   | + |
| Host specificity protein J                                           | + |   |   |   |   |
| Type IV conjugative transfer system lipoprotein traV                 |   | + |   |   | + |
| Maltoporin                                                           |   | + |   |   | + |
| Transporter                                                          |   | + |   |   |   |
| Siderophore amonabactin TonB-dependent receptor                      |   | + |   |   |   |
| TonB-dependent receptor                                              |   | + | + | + |   |
| Ligand-gated channel protein                                         |   | + |   |   |   |
| Porin                                                                |   | + | + | + | + |
| Glycine zipper 2TM domain-containing protein                         |   | + |   |   |   |
| Peptidoglycan DD-metalloendopeptidase family protein                 |   | + |   |   |   |
| Outer membrane protein assembly factor BamC                          |   | + |   |   |   |
| DUF2860 family protein                                               |   | + | + |   |   |
| TonB-dependent hemoglobin/transferrin/lactoferrin family receptor    |   | + | + | + | + |
| Membrane protein                                                     |   | + | + | + |   |
| Flagellar basal body L-ring protein FlgH                             |   | + | + | + | + |
| Efflux transporter outer membrane subunit                            |   | + |   |   |   |
| M23 family metallopeptidase                                          |   | + | + |   |   |
| Porin OmpAI                                                          |   | + |   |   |   |

|                                                        |   |   |   |   |
|--------------------------------------------------------|---|---|---|---|
| Porin OmpAII                                           | + |   |   |   |
| Type IV pilus secretin PilQ family protein             | + |   |   |   |
| Type IV pilin biogenesis protein                       | + |   |   |   |
| Carbohydrate porin                                     | + | + |   |   |
| Porin OmpA                                             | + |   |   |   |
| Conjugal transfer protein TraF                         |   | + | + |   |
| MSHA biogenesis protein MshQ                           |   | + |   |   |
| Murein hydrolase activator NlpD                        |   | + |   | + |
| Outer membrane beta-barrel protein                     |   | + | + | + |
| Luciferase                                             |   | + |   |   |
| Peptidase                                              |   | + |   |   |
| J domain-containing protein                            |   | + |   |   |
| MipA/OmpV family protein                               |   | + |   | + |
| YjbH domain-containing protein                         |   | + |   |   |
| TonB-dependent vitamin B12 receptor                    |   | + |   |   |
| Sphingomyelin phosphodiesterase                        |   | + |   |   |
| Retention module-containing protein                    |   | + |   |   |
| DUF1566 domain-containing protein                      |   |   | + |   |
| Outer membrane protein assembly factor                 |   |   | + |   |
| BamD                                                   |   |   |   |   |
| DUF1983 domain-containing protein                      |   |   | + |   |
| DUF748 domain-containing protein                       |   |   | + |   |
| DUF3466 family protein                                 |   |   | + |   |
| DUF1302 domain-containing protein                      |   |   | + |   |
| TonB-dependent receptor plug domain-containing protein |   |   | + |   |
| Maltoporin LamB                                        |   |   | + |   |
| Protein family protein                                 |   |   | + |   |

|                                                                           |   |   |
|---------------------------------------------------------------------------|---|---|
| LruC domain-containing protein                                            | + |   |
| Conjugal transfer protein TraN                                            |   | + |
| Type-F conjugative transfer system mating-pair stabilization protein TraN |   | + |
| Outer membrane porin, OprD family                                         |   | + |
| Outer membrane usher protein                                              |   | + |
| Ion channel protein Tsx                                                   |   | + |
| Fimbrial biogenesis outer membrane usher protein                          |   | + |
| OmpA family lipoprotein                                                   |   | + |
| TonB-dependent copper receptor                                            |   | + |
| Ig-like domain-containing protein                                         |   | + |
| Hemagglutinin repeat-containing protein                                   |   | + |
| Outer membrane channel protein TolC                                       |   | + |
| Murein transglycosylase A                                                 |   | + |
| Envelope stress response activation lipoprotein NlpE                      |   | + |
| Rcs stress response system protein RcsF                                   |   | + |
| Fimbria/pilus outer membrane usher protein                                |   | + |
| Llong-chain fatty acid transporter FadL                                   |   | + |
| Porin OmpC                                                                |   | + |
| Ligand-gated channel protein                                              |   | + |
| Lipid IV(A) palmitoyltransferase PagP                                     |   | + |
| Outer membrane protein OmpW                                               |   | + |
| Porin OmpF                                                                |   | + |
| Outer membrane protein OmpX                                               |   | + |

---

**Table S3.** Comparative reverse vaccinology outlining secreted antigens identified in this study.

| Secreted Antigens                                   | <i>P.</i>       | <i>A.</i>          | <i>V.</i>          | <i>M.</i>      | <i>Y.</i>      |
|-----------------------------------------------------|-----------------|--------------------|--------------------|----------------|----------------|
|                                                     | <i>salmonis</i> | <i>salmonicida</i> | <i>anguillarum</i> | <i>viscosa</i> | <i>ruckeri</i> |
| Peptidase M4 family protein                         | +               |                    |                    |                |                |
| LbtU family siderophore porin                       | +               |                    |                    |                |                |
| DUF4402 domain-containing protein                   | +               |                    |                    |                |                |
| DUF1561 family protein                              | +               |                    |                    |                |                |
| C1 family peptidase                                 | +               |                    |                    |                |                |
| Flagellar hook assembly protein FlgD                | +               | +                  | +                  | +              | +              |
| Flagellar hook-basal body complex protein           | +               |                    |                    |                |                |
| Flagellar basal-body rod protein FlgG               | +               | +                  | +                  | +              | +              |
| Flagellar hook-associated protein FlgK              | +               | +                  |                    |                | +              |
| Flagellar hook-associated protein FlgL              | +               |                    |                    |                | +              |
| Endonuclease/exonuclease/phosphatase family protein | +               |                    |                    |                |                |
| Cadherin-like domain-containing protein             | +               |                    |                    |                |                |
| Calcineurin-like phosphoesterase                    | +               |                    |                    |                |                |
| DUF4280 domain-containing protein                   | +               |                    |                    |                |                |
| Flagellar filament capping protein FliD             | +               | +                  |                    | +              | +              |
| B-type flagellin                                    | +               |                    |                    |                |                |
| TAXI family TRAP transporter solute-binding subunit |                 | +                  |                    |                |                |
| Flagellin                                           |                 | +                  | +                  | +              |                |
| DUF3466 family protein                              |                 | +                  |                    |                |                |
| M6 family metalloprotease domain-containing protein |                 | +                  |                    |                |                |

|                                                              |   |   |   |   |
|--------------------------------------------------------------|---|---|---|---|
| Type I secretion C-terminal target domain-containing protein | + |   |   |   |
| Phage tail protein                                           | + |   |   | + |
| Lipase                                                       | + |   |   |   |
| Beta-barrel pore-forming toxin aerolysin                     | + |   |   |   |
| Type 1 fimbrial protein                                      | + |   |   | + |
| Fimbrial protein                                             | + |   |   | + |
| Peptidase M66                                                | + |   |   |   |
| Flagellar hook protein FlgE                                  | + | + | + |   |
| Flagellar hook-length control protein FliK                   | + |   | + | + |
| M20/M25/M40 family metallo-hydrolase                         | + |   |   |   |
| Retention module-containing protein                          | + |   |   |   |
| Type IV pilin protein                                        | + |   |   |   |
| N-acetylglucosamine-binding protein GbpA                     | + |   |   | + |
| Pilin                                                        | + | + |   |   |
| Lateral flagellin LafA                                       | + |   |   |   |
| Lateral flagellar hook-associated protein                    | + |   |   |   |
| LfgK                                                         |   |   |   |   |
| Lateral flagellar basal-body rod protein LfgG                | + |   |   |   |
| Lateral flagellar hook protein FlgEL                         | + |   |   |   |
| M4 family metallopeptidase                                   |   | + | + |   |
| Trypsin-like peptidase domain-containing protein             |   | + |   |   |
| Hcp family type VI secretion system effector                 |   | + |   |   |
| SGNH/GDSL hydrolase family protein                           |   | + | + |   |
| Immune inhibitor A                                           |   | + |   |   |
| Class C beta-lactamase                                       |   | + |   |   |
| Nucleotidyltransferase                                       |   | + |   |   |

|                                                         |   |   |   |
|---------------------------------------------------------|---|---|---|
| Hemolysin                                               | + |   |   |
| Endonuclease                                            | + | + |   |
| Deoxyribonuclease I                                     | + |   |   |
| Exo-alpha-sialidase                                     | + |   |   |
| Chitinase                                               | + |   |   |
| Ig-like domain-containing protein                       |   | + |   |
| Triacylglycerol lipase                                  |   | + |   |
| Transferrin-binding protein-like solute binding protein |   | + |   |
| Collagenase                                             |   | + |   |
| Membrane-targeted effector domain-containing toxin      |   | + |   |
| DUF1566 domain-containing protein                       |   | + |   |
| Type II secretion system protein                        |   | + |   |
| Lytic polysaccharide monooxygenase                      |   | + | + |
| Sphingomyelin phosphodiesterase                         |   | + |   |
| Methyltransferase                                       |   | + |   |
| ABC transporter substrate-binding protein               |   | + | + |
| Flagellar basal body protein FlgE                       |   | + | + |
| Aerolysin family beta-barrel pore-forming toxin         |   | + |   |
| Rcin-type beta-trefoil lectin domain protein            |   | + |   |
| DUF3570 domain-containing protein                       |   | + |   |
| Conjugal transfer protein TraN                          |   |   | + |
| DUF481 domain-containing protein                        |   |   | + |
| Fimbria/pilus periplasmic chaperone                     |   |   | + |
| Heme acquisition hemophore HasA                         |   |   | + |

|                                                |   |   |   |   |   |   |
|------------------------------------------------|---|---|---|---|---|---|
| Spore coat protein U domain-containing protein |   |   |   |   |   | + |
| Tail fiber protein                             |   |   |   |   |   | + |
| FliC/FljB family flagellin                     |   |   |   |   |   | + |
| Patatin-like phospholipase RssA                |   |   |   |   |   | + |
| M10 family metalloproteinase                   |   |   |   |   |   | + |
| Peptidase M4 family protein                    | + |   |   |   |   |   |
| LbtU family siderophore porin                  | + |   |   |   |   |   |
| DUF4402 domain-containing protein              | + |   |   |   |   |   |
| DUF1561 family protein                         | + |   |   |   |   |   |
| C1 family peptidase                            | + |   |   |   |   |   |
| Flagellar hook assembly protein FlgD           | + | + | + | + | + | + |

**Table S4.** Selected B and T (MHC I and II) cell epitopes identified for the common antigens.

| Antigens                            | Epitopes                      | aa                                                    |                     |  |         |
|-------------------------------------|-------------------------------|-------------------------------------------------------|---------------------|--|---------|
|                                     | B CELL                        | MHC I                                                 | MHC II              |  |         |
| TonB-dependent siderophore receptor | TANAT (14-18)                 | LMTKKTANA(9-17), NATKITRTF(16-24), KTANATKITR (13-23) | LMTKKTAN A (9-17)   |  |         |
|                                     | AKATSEPDQEPKHKKYNEKSATIPS     | TSEPDQEPK(42-50), ATIPSSAKI(59-67), KYNEKSATI (53-61) |                     |  | 39-70   |
|                                     | SAKISSE (39-70)               |                                                       |                     |  |         |
|                                     | Y (171), Q (173)              | YSQTGLSLF (171-179)                                   |                     |  | 171-179 |
|                                     | PIPNQKTTT (215-223)           | TLKQSVTAA (223-231)                                   |                     |  | 215-233 |
|                                     | YWPSETTEM (283-291)           | ETTEMKANL (287-295)                                   |                     |  | 283-295 |
|                                     | DADAELPGALTPEQYNNNWRQSNT      | NTPDNRYQA(321-329), RQSNTPDNRY (318-327)              | PEQYNNNW R(310-318) |  | 299-327 |
|                                     | PDNRY (299-327)               |                                                       |                     |  |         |
|                                     | TPT (343-345)                 | IISHDFTPT (337-345)                                   |                     |  | 337-345 |
|                                     | FSWQDPGIAGVTPTDIAQS (361-379) | RNFSWQDPGI (359-368)                                  | FSWQDPGIA( 361-369) |  | 359-379 |
|                                     | VY (419-420)                  | VYTDNIATV (419-427)                                   |                     |  | 419-427 |
|                                     | AAV (443-445)                 | STNAYAAYA (438-446)                                   |                     |  | 438-446 |
|                                     | QVANSNGQSLA (519-529)         | QVANSNGQSL (519-528)                                  |                     |  | 519-529 |



|                                 |                      |                              |                                     |                                  |
|---------------------------------|----------------------|------------------------------|-------------------------------------|----------------------------------|
|                                 |                      | H (586)                      | TQLHYTPDF (583-591)                 | 583-591                          |
|                                 |                      | IQGENKGNQMPYA (609-621)      | YAAKNQFSFI (620-629)                | 609-629                          |
|                                 |                      | FSDAANTTTEQTTQGPIP (650-667) | TTQGPIPNIY (661-669)                | 650-669                          |
|                                 |                      | SQGITPAPGRS (710-720)        | ITPAPGRSF (713-721)                 | 710-721                          |
| LPS-assembly<br>protein LptD    |                      | YSSTPTTKTKTPTKT (25-39)      | GLLPSLTYS(18-26), SLTYSSTPT (22-30) | PTKTALDWV (22-44)<br>(36-44)     |
|                                 |                      | H (50)                       | DWVASNKNHL (42-51)                  | 42-51                            |
|                                 |                      | ALPGTPGPFNQS (71-82)         | ALPGTPGPF (71-79)                   | 71-82                            |
|                                 |                      | TYISS (84-88)                | QSKTYISSK (81-89)                   | 84-89                            |
|                                 |                      | STTLTPSGQTL (90-100)         | TLTDNVYLY (99-107)                  | 90-107                           |
|                                 |                      | TRDPKTGDMTQI (121-132)       | TQINATGHVR (130-139)                | 121-139                          |
|                                 |                      | HWQPQKQQAQI (153-163)        | KQQAQINDV (158-166)                 | PQKQQAQIN (153-166)<br>(156-164) |
|                                 |                      | DRSSQKVPANNTQLSNPGTGYAHG     | KVPANNTQL(180-188), YAHGSATTV       | 175-206                          |
|                                 |                      | SATTVSQQ(175-206)            | (195-203)                           |                                  |
|                                 |                      | YSTCAPIPGQTW (218-229)       | CAPIPGQTW (221-229)                 | 218-229                          |
|                                 |                      | QTGRGEA (241-247)            | NQQTGRGEAY (239-248)                | 239-248                          |
|                                 |                      | NNQRQ (270-274)              | YFNFPINNQR (264-273)                | 264-274                          |
|                                 |                      | GLS (289-291)                | SLTTPYYLNLA (291-301)               | 289-301                          |
|                                 |                      | AYGN (345-348)               | KRYNVFFGQ (349-357)                 | 345-357                          |
|                                 |                      | TQFT (359-362)               | TQFTPNLNV (359-367)                 | 359-367                          |
|                                 |                      | LA (490-491)                 | NTLANSANI (388-396)                 | 388-491                          |
|                                 |                      | YQFPDPTLS (421-429)          | TLSLGNRYYA (427-436)                | 421-436                          |
|                                 |                      | S (488), QTDF (490-493)      | WSGQTDFGY (487-495)                 | 487-495                          |
|                                 |                      | NNNTQGQDHL (510-519)         | GQDHLSRGI (515-523)                 | 510-523                          |
|                                 |                      | YKQT (545-548)               | RYKQTLEPR (544-552)                 | 544-552                          |
|                                 |                      | EQI (613-615)                | ALINNNGEQI (606-615)                | 606-615                          |
|                                 |                      | THDNENY (696-702)            | HIFNVGYTH (689-697)                 | 689-702                          |
|                                 |                      | GVAPPNTKGL (713-722)         | SQDELINGV(706-714), GLYSSMYWA       | 706-729                          |
|                                 |                      |                              | (721-729)                           |                                  |
| outer<br>protein<br>factor BamA | membrane<br>assembly | WAA (26-28)                  | WAAPAGFVI (26-34)                   | 26-34                            |
|                                 |                      | VK (56-57)                   | DLVLTNLPVK (48-57)                  | 48-57                            |

|                                |                                             |                     |
|--------------------------------|---------------------------------------------|---------------------|
| HHSI (110-113)                 | IVTEGHHSI (105-113)                         | 105-113             |
| NDKYTKPKLDT (219-229)          | SFITDNDKY (214-222)                         | 214-229             |
| TPVPEVNKDNH (333-343)          | EVNKNHNTV (337-345)                         | 333-345             |
| KATTPVVPKPGYV (409-422)        | KPGYVNVVDYK (418-427)                       | 409-427             |
| PNVLG (458-462)                | NVLGTGNTL (459-467)                         | GLGYSTPNV (452-460) |
| PYWTESG (487-493)              | FTDPYWTES (484-492)                         | 484-493             |
| NKTNAEEQGLADYSTNSY (503-520)   | EEQGLADYS (508-516),<br>EEQGLADYS (508-516) | 503-520             |
| LNQGTNNSV (547-555)            | NSVTVQNFI (553-561)                         | 547-561             |
| KWPFPNTGEKLS (586-597)         | YTNLDKWPF (581-589)                         | 581-597             |
| GYGNSYSGKGG (637-648)          | GSGKGGLPF (643-651)                         | GLPFFNNFG (648-656) |
| AGGWSGSPTW (657-666)           | PTWGMIRGY (664-672)                         | 657-672             |
| TLGPNDTIACSDGTQCEGNA (674-694) | DTLGPNDTI (673-681)                         | TCEGNAIGG(689-697)  |
| VYDTTNRDTYNTANS (731-746)      | VYDTTNRD (731-739)                          | 731-746             |
| NYLGDKSPSL (749-758)           | KSPSLSNLAY (754-763)                        | 749-763             |

**Table S5.** Conserved putative domains of qualifying vaccine candidates.

| Protein                                    | Conserved Domain     | Accession | Interval | E-Value   |
|--------------------------------------------|----------------------|-----------|----------|-----------|
| <b>LPS-assembly protein LptD</b>           | LptD                 | COG1452   | 75-823   | 9.29E-107 |
|                                            | PRK04423             | PRK04423  | 91-828   | 1.20E-94  |
|                                            | PRK03761             | PRK03761  | 80-826   | 2.72E-77  |
|                                            | OstA_C               | pfam04453 | 348-734  | 4.02E-74  |
|                                            | OstA                 | pfam03968 | 85-141   | 2.95E-04  |
| <b>TonB-dependent siderophore receptor</b> | FecA                 | COG4772   | 85-729   | 7.72E-139 |
|                                            | TonB-siderophor      | TIGR01783 | 99-729   | 1.04E-83  |
|                                            | ligand_gated_channel | cd01347   | 105-729  | 2.36E-70  |

|                 |           |         |          |
|-----------------|-----------|---------|----------|
| CirA            | COG1629   | 89-729  | 1.29E-45 |
| TonB-hemin      | TIGR01785 | 89-729  | 2.90E-41 |
| FepA            | COG4771   | 90-729  | 2.66E-36 |
| TonB-hemlactrns | TIGR01786 | 95-729  | 1.92E-35 |
| TonB_dep_Rec    | pfam00593 | 280-728 | 1.72E-30 |
| BtuB            | COG4206   | 105-729 | 2.10E-29 |
| TonB-B12        | TIGR01779 | 105-729 | 4.22E-26 |
| Plug            | pfam07715 | 95-208  | 6.55E-25 |
| PRK10064        | PRK10064  | 90-700  | 7.07E-23 |
| Fiu             | COG4774   | 100-729 | 3.85E-22 |
| PRK13483        | PRK13483  | 90-729  | 7.63E-22 |
| PRK13486        | PRK13486  | 90-624  | 2.08E-21 |
| PRK13528        | PRK13528  | 63-729  | 1.41E-18 |
| PRK13513        | PRK13513  | 58-729  | 1.01E-17 |
| PRK13484        | PRK13484  | 50-646  | 9.26E-15 |
| PRK13524        | PRK13524  | 105-729 | 7.67E-14 |
| FhuE            | COG4773   | 100-729 | 1.74E-13 |
| PRK09840        | PRK09840  | 104-729 | 2.79E-11 |
| btuB            | PRK10641  | 105-214 | 5.09E-11 |
| OMP_b-brl_3     | pfam14905 | 440-726 | 1.75E-07 |
| PRK10044        | PRK10044  | 455-702 | 3.41E-05 |
| TonB-Xanth-Caul | TIGR01782 | 421-729 | 6.35E-05 |
| PRK14050        | PRK14050  | 89-214  | 1.28E-04 |
| PRK14049        | PRK14049  | 64-214  | 6.69E-03 |

|                                        |                |           |         |           |
|----------------------------------------|----------------|-----------|---------|-----------|
| <b>Outer membrane protein assembly</b> | OM_YaeT        | TIGR03303 | 32-805  | 0.00E+00  |
| <b>factor BamA</b>                     | BamA           | COG4775   | 9-805   | 0.00E+00  |
|                                        | PRK11067       | PRK11067  | 9-805   | 1.61E-165 |
|                                        | Bac_surface_Ag | pfam01103 | 459-805 | 1.21E-58  |
|                                        | TamA           | COG0729   | 320-805 | 1.30E-26  |
|                                        | POTRA          | pfam07244 | 184-271 | 1.65E-13  |
|                                        | POTRA          | pfam07244 | 274-354 | 1.99E-10  |
|                                        | POTRA          | pfam07244 | 100-180 | 2.08E-09  |
|                                        | POTRA          | pfam07244 | 357-430 | 1.65E-08  |
|                                        | POTRA          | pfam07244 | 32-99   | 3.38E-04  |
| <b>Flagellar hook assembly protein</b> | flgD           | PRK06655  | 1-227   | 4.17E-74  |
| <b>FlgD</b>                            | FlgD           | COG1843   | 4-227   | 2.48E-51  |
|                                        | flgD           | PRK12634  | 1-223   | 3.23E-43  |
|                                        | FLgD_tudor     | pfam13861 | 90-223  | 8.92E-39  |
|                                        | flgD           | PRK12633  | 20-226  | 3.10E-31  |
|                                        | flgD           | PRK12813  | 34-226  | 2.44E-25  |
|                                        | FlgD           | pfam03963 | 6-80    | 4.24E-23  |
|                                        | flgD           | PRK09618  | 5-113   | 1.37E-20  |
|                                        | flgD           | PRK12812  | 16-177  | 1.65E-19  |
|                                        | FlgD_ig        | pfam13860 | 112-179 | 1.31E-16  |
|                                        | flgD           | PRK09619  | 33-227  | 1.38E-14  |
|                                        | flgD           | PRK06009  | 5-101   | 7.56E-13  |
|                                        | flgD           | PRK11911  | 29-114  | 9.95E-11  |
|                                        | flgD           | PRK05842  | 19-203  | 1.70E-09  |
|                                        | flgD           | PRK06792  | 20-114  | 1.79E-08  |
|                                        | DUF2271        | pfam10029 | 152-188 | 7.39E-05  |

|                                         |               |           |         |          |
|-----------------------------------------|---------------|-----------|---------|----------|
| <b>Flagellar basal-body rod protein</b> | flgG          | PRK12693  | 1-259   | #####    |
| <b>FlgG</b>                             | flgG_G_neg    | TIGR02488 | 4-259   | #####    |
|                                         | flgG          | PRK12691  | 4-259   | #####    |
|                                         | flgG          | PRK12694  | 1-259   | #####    |
|                                         | FlgG          | COG4786   | 1-259   | 1.59E-98 |
|                                         | flgG          | PRK12816  | 1-254   | 1.39E-82 |
|                                         | flgG          | PRK12692  | 4-261   | 1.11E-81 |
|                                         | FlgEFG_subfam | TIGR03506 | 4-243   | 2.49E-79 |
|                                         | flgG          | PRK12636  | 18-257  | 2.21E-58 |
|                                         | flgG          | PRK12817  | 1-258   | 8.83E-47 |
|                                         | flgE          | PRK05682  | 4-255   | 6.47E-39 |
|                                         | flgF          | PRK12690  | 19-242  | 3.55E-38 |
|                                         | flgF          | PRK12640  | 1-259   | 9.51E-37 |
|                                         | flgF          | PRK12689  | 11-253  | 3.62E-36 |
|                                         | FlgE          | COG1749   | 1-257   | 1.65E-35 |
|                                         | FlgF          | COG4787   | 1-261   | 7.25E-35 |
|                                         | flgG          | PRK12818  | 1-255   | 3.01E-33 |
|                                         | Flg_bbr_C     | pfam06429 | 182-259 | 2.20E-23 |
|                                         | flgE          | PRK08425  | 1-133   | 5.95E-23 |
|                                         | flgE          | PRK06803  | 7-261   | 3.60E-21 |
|                                         | flgF          | PRK12642  | 1-255   | 1.24E-20 |
|                                         | flgE_epsilon  | TIGR02489 | 1-133   | 7.90E-20 |
|                                         | flgF          | PRK12641  | 18-261  | 5.01E-17 |
|                                         | flgE          | PRK08425  | 170-259 | 8.81E-17 |
|                                         | flgE          | PRK12637  | 147-257 | 2.55E-15 |
|                                         | flgF          | TIGR02490 | 149-241 | 1.86E-14 |
|                                         | flgE_epsilon  | TIGR02489 | 170-259 | 1.92E-13 |
|                                         | flgF          | PRK12643  | 11-224  | 6.87E-13 |

---

|            |           |         |          |
|------------|-----------|---------|----------|
| flgG       | PRK12819  | 5-251   | 1.49E-11 |
| flgE       | PRK05841  | 170-255 | 8.19E-11 |
| flgC       | PRK05681  | 204-255 | 5.81E-10 |
| FlgC       | COG1558   | 204-255 | 2.66E-09 |
| flgE       | PRK12637  | 10-133  | 1.21E-08 |
| FlgC       | TIGR01395 | 204-255 | 1.32E-08 |
| flgE       | PRK05841  | 8-133   | 5.17E-06 |
| flgC       | PRK05681  | 7-62    | 3.05E-05 |
| FlgC       | COG1558   | 7-43    | 3.87E-05 |
| Flg_bb_rod | pfam00460 | 5-35    | 4.45E-05 |
| flgK_ends  | TIGR02492 | 4-83    | 1.89E-04 |
| flgC       | PRK12632  | 4-45    | 2.77E-04 |
| FlgC       | TIGR01395 | 7-61    | 2.95E-04 |
| flgB       | PRK12623  | 9-42    | 7.55E-04 |
| flgC       | PRK12782  | 4-33    | 1.37E-03 |
| FlgK       | COG1256   | 176-257 | 1.81E-03 |
| flgK       | PRK07739  | 5-43    | 2.96E-03 |
| flgC       | PRK12631  | 205-255 | 3.07E-03 |
| flgK       | PRK08471  | 211-257 | 5.48E-03 |
| flgC       | PRK12628  | 205-255 | 5.94E-03 |
| flgC       | PRK12630  | 7-42    | 8.58E-03 |

---
