# Supplementary material for: Comparative Reverse Vaccinology of Piscirickettsia salmonis, Aeromonas salmonicida, Yersinia ruckeri, Vibrio anguillarum and Moritella viscosa, Frequent Pathogens of Atlantic Salmon and Lumpfish Aquaculture
Source: MDPI journal article supplement (doi:10.3390/vaccines10030473), 2022-03-18
Supplement: s1 [file s1]

# MolProbity Ramachandran analysis

model\_4\_1\_trimmed.pdb, model 1

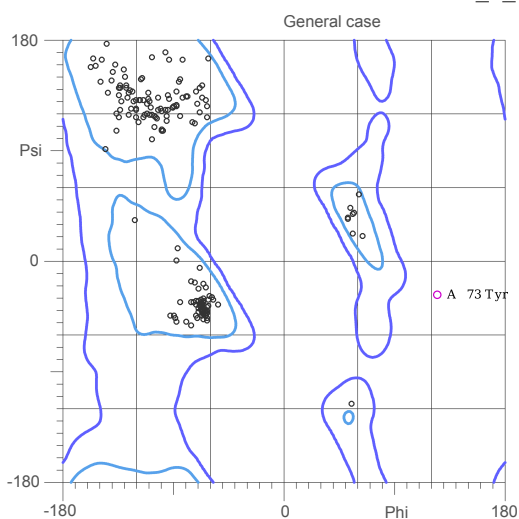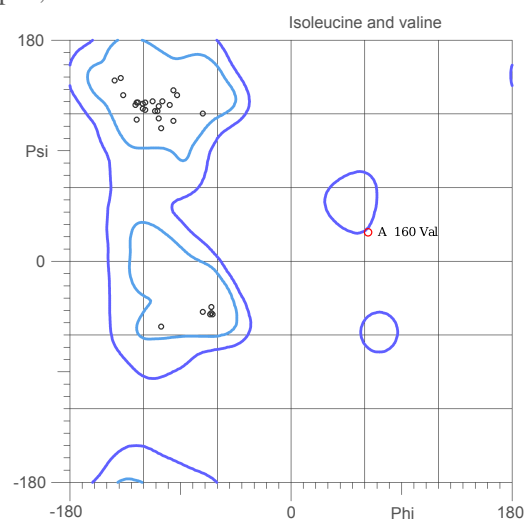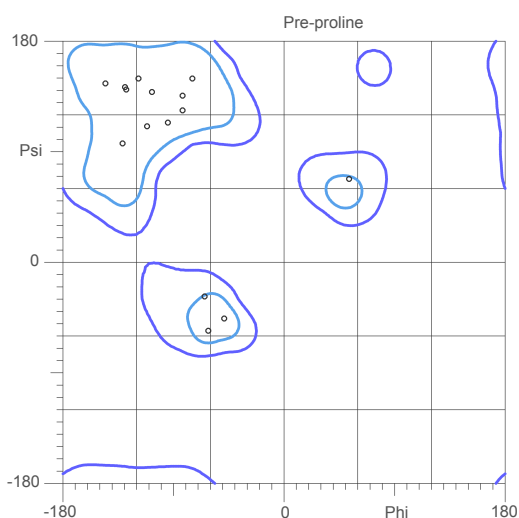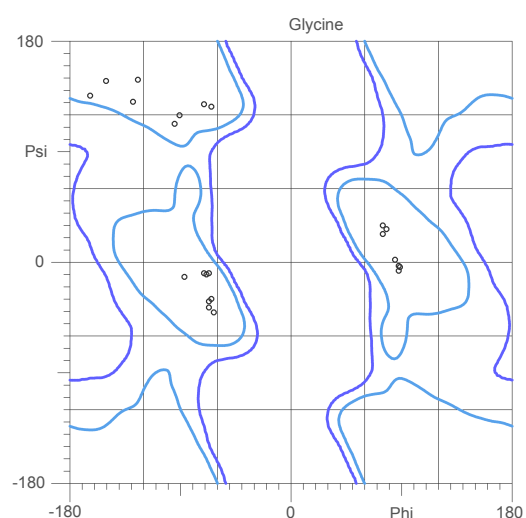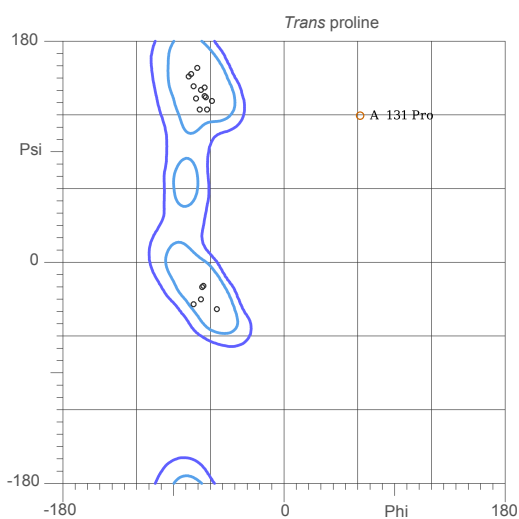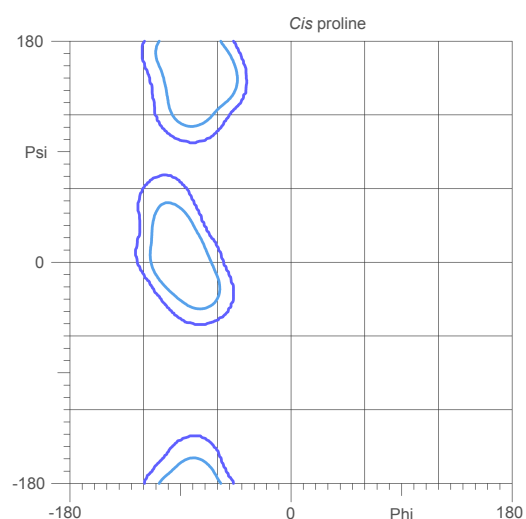

98.4% (251/255) of all residues were in favored (98%) regions.  
98.8% (252/255) of all residues were in allowed (>99.8%) regions.

There were 3 outliers (phi, psi):

A 73 Tyr (125.4, -27.3)  
A 131 Pro (62.1, 120.2)  
A 160 Val (63.8, 24.5)
